# Supplementary material for: Biomimetic reconstruction of butterfly wing scale nanostructures for radiative cooling and structural coloration
Source: Royal Society of Chemistry journal article supplement (doi:10.1039/d2nh00166g), 2022-01-01
Supplement: d2nh00166g1.pdf [file d2nh00166g1.pdf]

## **Supplementary Information**

### **Biomimetic Replication of Butterfly Wing Scale Nanostructure for Radiative cooling and Structural Coloration**

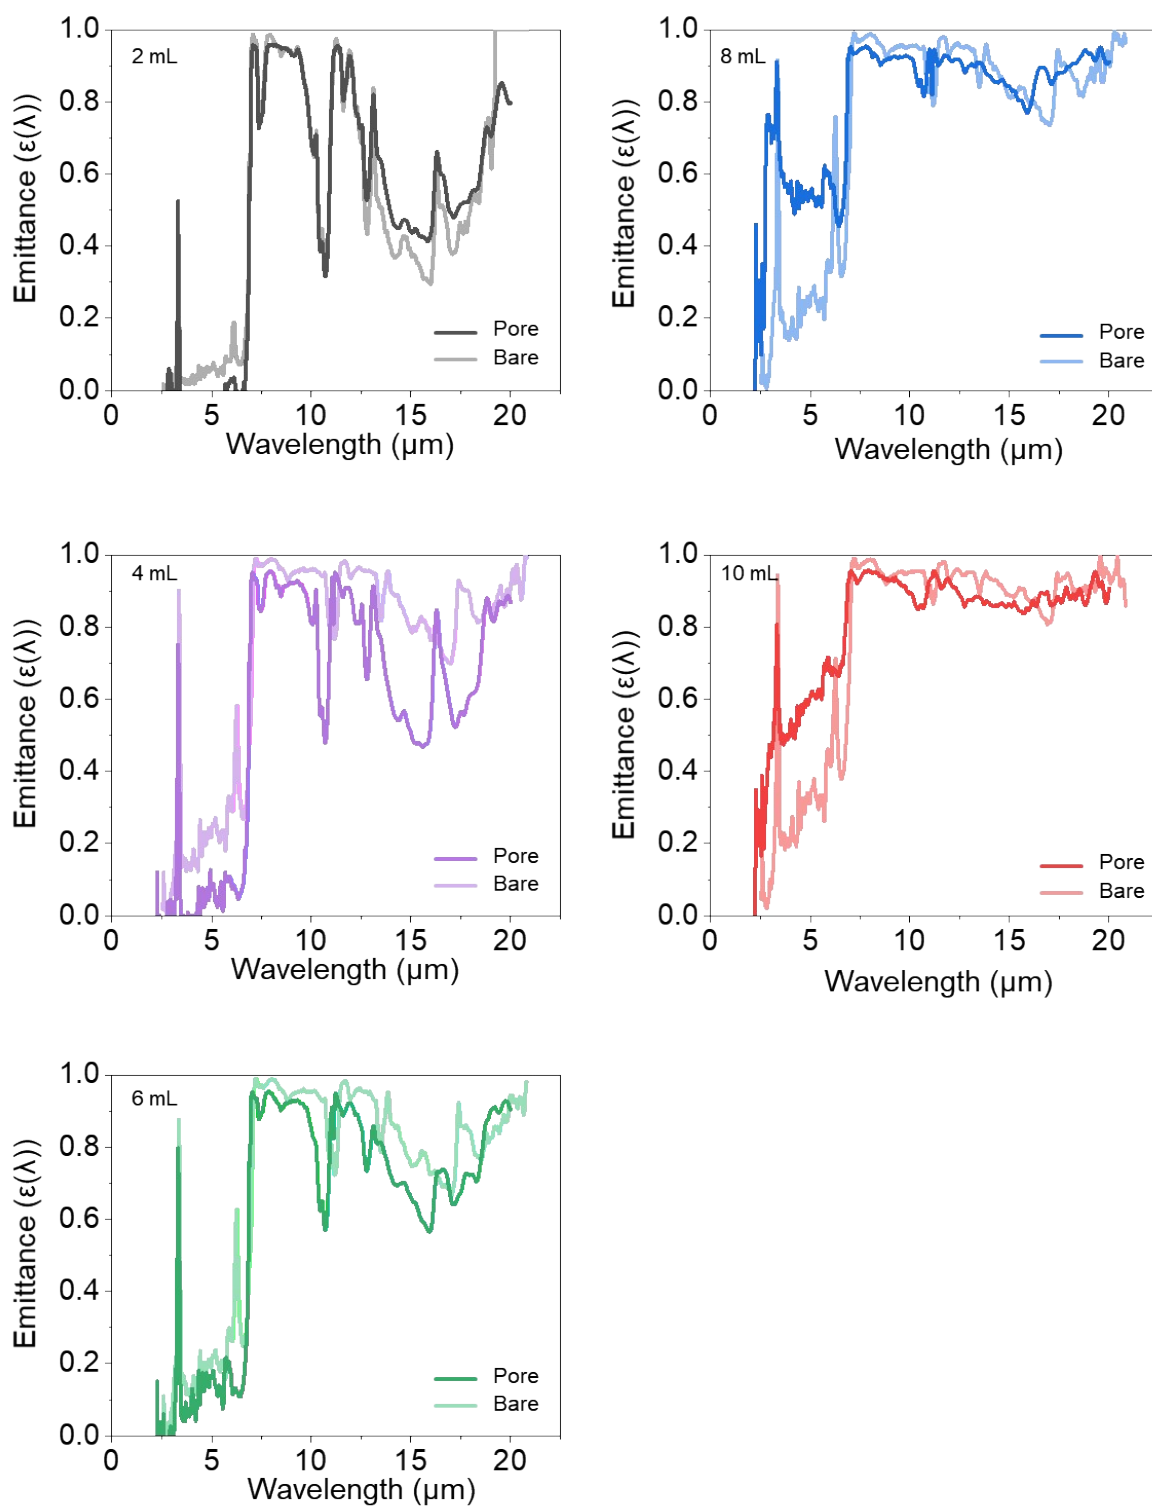

**Figure S1. FTIR comparison between porous and pristine PVDF-HFP film of different thickness**

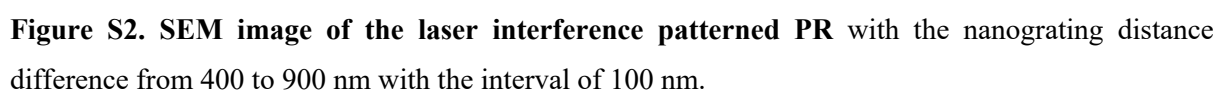

**Figure S2. SEM image of the laser interference patterned PR with the nanograting distance difference from 400 to 900 nm with the interval of 100 nm.**

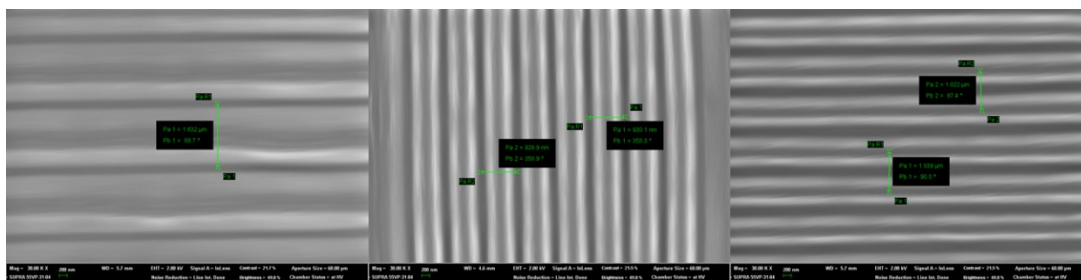

**Figure S3. SEM image of the soft-imprinted PDMS** with the nanograting distance difference of 700, 800 and 900 nm.
